# Supplementary material
Source: PubMed Central journal article supplement (PMC5588466)

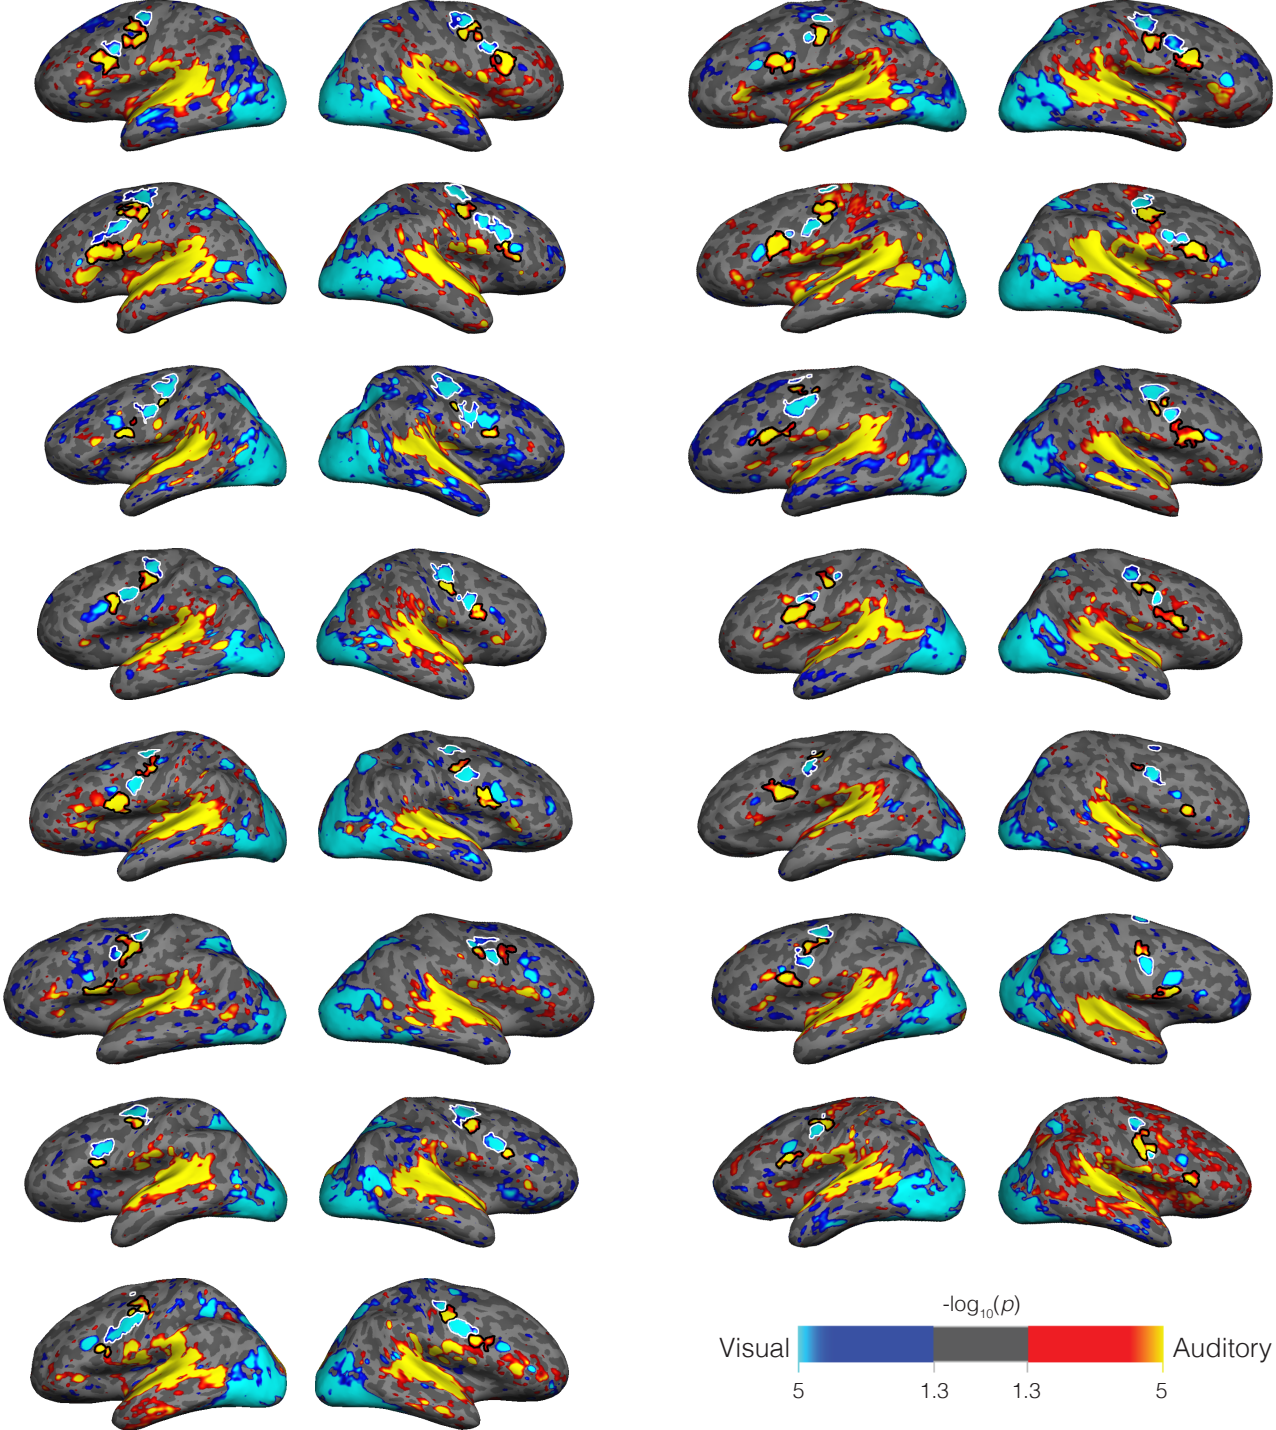

Supplement: zns999170064so1.pdf [file zns999170064so1.pdf]

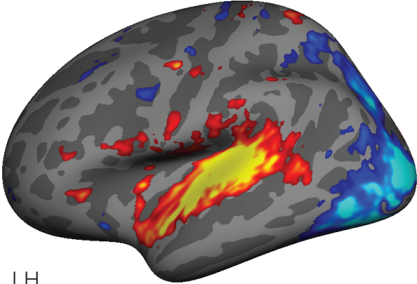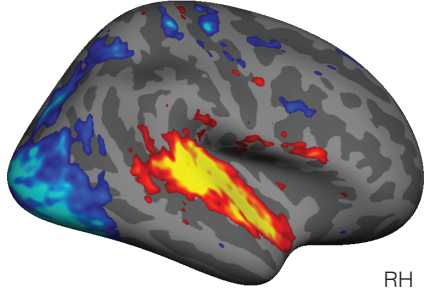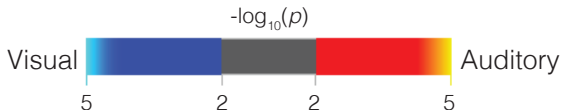

Supplement: zns999170064so2.pdf [file zns999170064so2.pdf]
